# Supplementary material for: A corpus-based analysis of stance markers in upper and lower proficiency level argumentative essays by Saudi learners
Source: Frontiers journal article supplement (doi:10.3389/feduc.2025.1589004), 2025-09-05
Supplement: Table_1.xlsx [file Table_1.xlsx]

## Sheet: hedges
Approximative hedges			Self-mention hedges			Evidential verb hedges			Modal hedges
about			from my experience			appear(s)(ed)(ing)		去除”出现“，保留”好像“	can
almost			from our perspective			evident/ly			could
apparent			I believe			indicate(s)(d)(ing)			may
apparently			we believe			indication(s)			might
approximately			I imagine			indicative			maybe			[lemma="can"]|[lemma="could"]|[lemma="may"]|[lemma="might"]|[lemma="maybe"]
around			we think			indicator
broadly			I think			seem(s)(ed)(ing)
certain amount			in my experience			seeming/ly			[lemma="evident"]|[lemma="evidently"]|[lemma="indicate"]|[lemma="indication"]|[lemma="indicative"]|[lemma="indicator"]|[lemma="seem"]|[lemma="seeming"]|[lemma="seemingly"]|[lemma="suggest"]|[lemma="tend"]
certain extent			in my opinion			suggest(s)(ed)
certain level			in my view			tend(s)(ed)
doubt that			to my knowledge
doubtful			[lemma="to"][]{0,3}[lemma="my"][lemma="knowledge"]
essentially
fairly
frequently
generally
in most cases
in most instances
in this view
largely
likely
mainly
mostly
often
on the whole
perhaps
plausible
plausibly
possibility
possible
possibly
presumable/y
probable/y
quite
rather
relatively
roughly
sometimes
somewhat
typical/lly
uncertain/ly
unclear/ly
unlikely
usually

## Sheet: boosters
actually		actually		actually	always	beyond doubt	can accurately	can actually	can barely	can certainly	can clearly
always		always		can completely	can definitely	can directly	can easily	can honestly	can only	can readily	can really	can scarcely	can significantly	can simply	can successfully
beyond doubt		beyond doubt		can truly	certain (ly)	clear(ly)	conclusively	decidedly	definite(ly)	demonstrate(s)(d)	doubtless	establish(es)(ed)	evident	extremely	find	finds
can accurately		can accurately		found	incontestable	incontestably	incontrovertible	incontrovertibly	indeed	indisputable	indisputably	know	known	knows	more	most
can actually		can actually		must	never	no doubt	of course	ought	realize	realizes	really	should	show	showed	shows	sure
can barely		can barely		surely	true	truly	undeniable	undeniably	undoubtedly	very	without doubt
can certainly		can certainly
		can clearly
can clearly		can completely
can completely		can definitely
can definitely		can directly
can directly		can easily
can easily		can honestly
can honestly		can only
can only		can readily
can readily		can really
can really		can scarcely
can scarcely		can significantly
can significantly		can simply
can simply		can successfully
can successfully		can truly
can truly		certain (ly)
certain (ly)		clear(ly)
clear(ly)		conclusively
conclusively		decidedly
decidedly		definite(ly)
definite(ly)		demonstrate(s)(d)		|
demonstrate(s)(d)		doubtless
doubtless		establish(es)(ed)
establish(es)(ed)		evident
evident		extremely
extremely		find
find		finds
finds		found
found		incontestable
incontestable		incontestably
incontestably		incontrovertible
incontrovertible		incontrovertibly
incontrovertibly		indeed
indeed		indisputable
indisputable		indisputably
indisputably		know
know		known
known		knows
knows		more
more		most
most		must
must		never
never		no doubt
no doubt		of course
of course		ought
ought		realize
realize		realizes
realizes		really
really		should
should		show
show		showed
showed		shows
shows		sure
sure		surely
surely		true
true		truly
truly		undeniable
undeniable		undeniably
undeniably		undoubtedly
undoubtedly		very
very		without doubt
without doubt

## Sheet: code glosses
Elucidation		Exemplification		Emphasis		Counter-expectancy (sometimes follow concessions marked by, e.g., while, although):
To be precise		for example		specifically		as a matter of fact
put another way		for instance		in particular		in fact
put differently		an example of		particularly		indeed,
i.e.		an example		especially
that is (to say)		to illustrate		namely
which is to say		e.g.
in other words		one example
to put it . . . /put *ly		such as
to put it simply		, say,
defined as		. Like
I mean
that means
this means
which means
known as
likewise
more accurately
much like
namely

## Sheet: contrastive
alternatively
although
at the same time
but
by contrast
conversely
however
in contrast
on the other hand
nevertheless
nonetheless
rather
still
though
whereas
while
yet
